# Supplementary material
Source: PubMed Central journal article supplement (PMC3281600)
Supplement: supp_M111.326207_jbc.M111.326207-2.pdf [file supp_M111.326207_jbc.M111.326207-2.pdf]

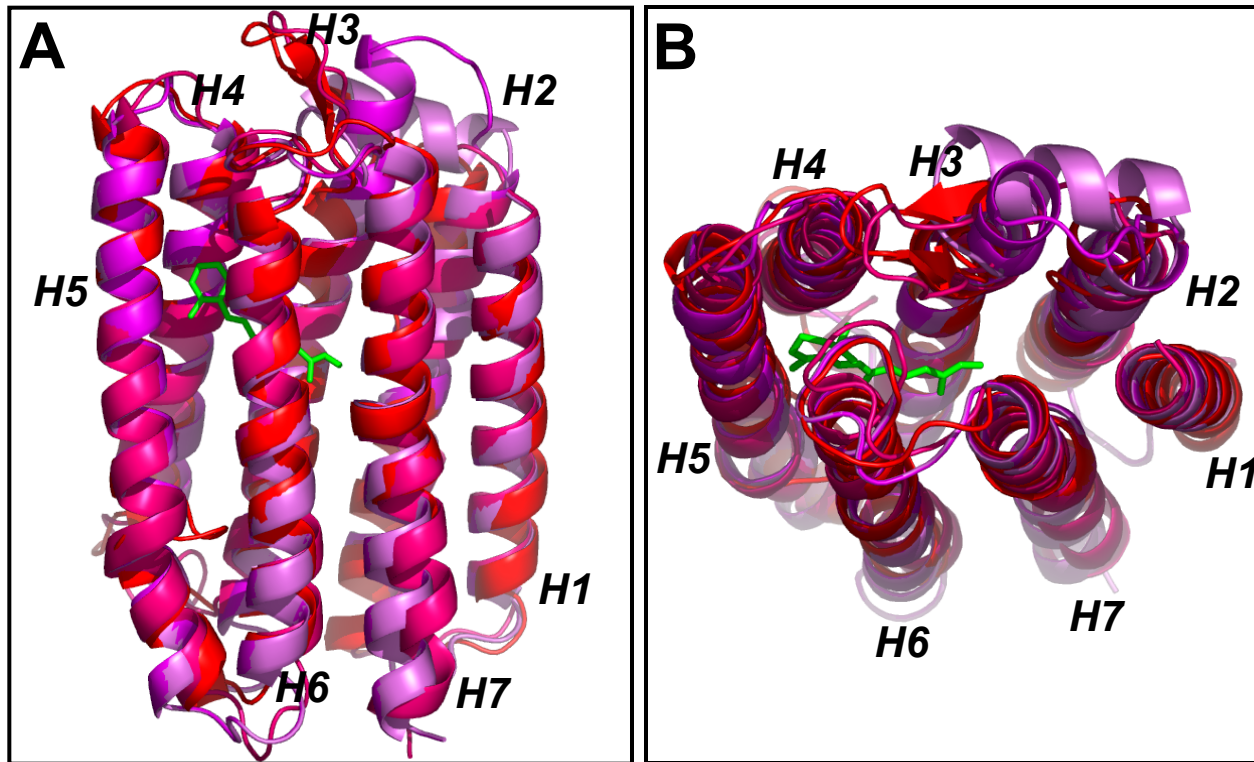

Figure S1. ChR2 structure according to molecular modeling and superposition of the different bioinformatic models. (A) Superposition of ChR2 models 1, 2, 3, 4 (in violet, magenta, hotpink and red, respectively). The retinal is indicated by the green sticks. (B) Top view. Helices numbers are indicated from H1 to H7.
