# Supplementary material
Source: PubMed Central journal article supplement (PMC3281600)

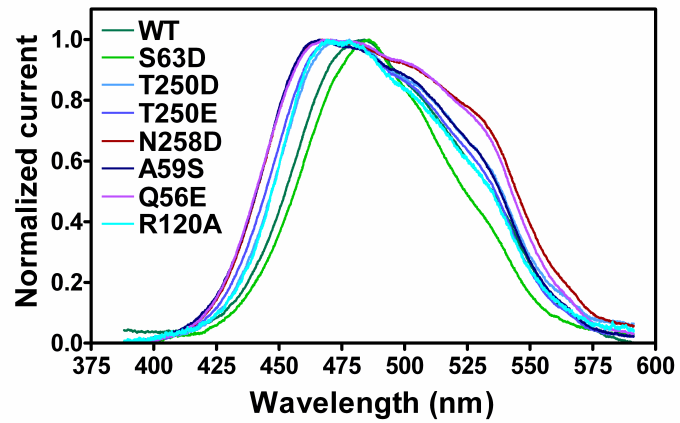

Figure S3: Photoactivation spectra of the ChR2 mutants.

Supplement: supp_M111.326207_FigureS3.pdf [file supp_M111.326207_FigureS3.pdf]

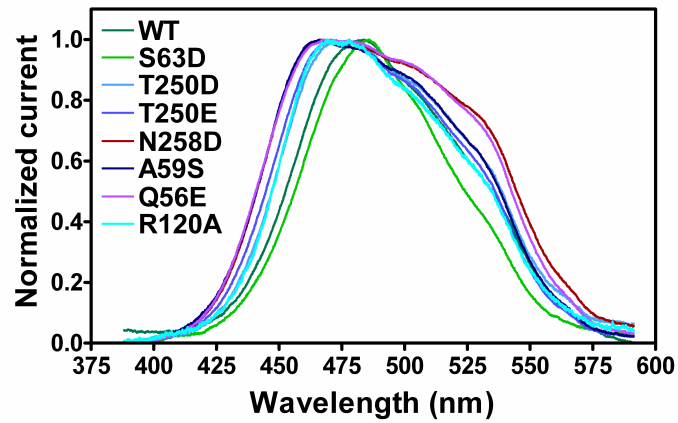

Figure S3: Photoactivation spectra of the ChR2 mutants.

Supplement: supp_M111.326207_jbc.M111.326207-4.pdf [file supp_M111.326207_jbc.M111.326207-4.pdf]
